# Supplementary material
Source: PubMed Central journal article supplement (PMC5710364)
Supplement: jama-318-1450-s001.pdf [file jama-318-1450-s001.pdf]

## Supplementary Online Content

Guidet B, Leblanc G, Simon T, et al; ICE-CUB 2 Study Network. Effect of systematic intensive care unit triage on long-term mortality among critically ill elderly patients in France: a randomized clinical trial. *JAMA*. doi:10.1001/jama.2017.13889

### **eAppendix.** Supplemental Methods

**eTable 1.** List of the Critical Conditions for Inclusion

**eTable 2.** Detailed List of Initial Clinical Diagnoses of Included Patients

**eTable 3.** Characteristics of the Triage Process

**eTable 4.** Number and Characteristics of Protocol Violations

**eTable 5.** Number of Decisions for ICU Admission to the ICU and Number of Patients Actually Admitted

**eTable 6.** Characteristics of Patients Admitted to the Intensive Care Unit

**eTable 7.** Baseline Index of Independence in ADL

**eTable 8.** Index of Independence in ADL Scale at 6 Months

**eTable 9.** Additional Data at 6-Month Follow-up

### **eReferences**

This supplementary material has been provided by the authors to give readers additional information about their work.

## eAppendix. Supplementary Methods

### Study Oversight

- Members of the steering committee: Bertrand Guidet, Maité Garrouste-Orgeas, Caroline Thomas, Dominique Pateron, Tabassome Simon, Ariane Boumendil.
- The study was approved by the Comité de Protection des Personnes d'Ile-de-France 9.
- The Department of Clinical Research and Development of Ile-de-France (*Département de la Recherche Clinique et du Développement –DRCD- Ile-de-France*), served as independent oversight committee, had full access to the mortality data and could stop the trial in case of important disparity in mortality rates between groups.
- The conduct of the study was monitored by the clinical research assistants of the sponsor.
- There was no interim analysis.

## **Inclusion Criteria**

1. Patients 75 years of age or over.
2. Admitted to the emergency department.
3. A diagnosis among a pre-established list of critical conditions (Table S1).
4. A preserved functional status, as assessed by an Index of Independence in Activities of Daily Living<sup>1</sup>  $\geq 4$  (0 = totally dependent, 6 = independent) or not evaluable.
5. A preserved nutritional status, defined as the absence of cachexia, subjectively assessed by physicians at bedside.
6. Free of active cancer.

## **Exclusion Criteria**

1. An emergency department stay over 24 hours.
2. A secondary referral to the emergency department.
3. Patient's or surrogate decision-makers' refusal to participate.
4. No social security coverage.

## **Patient Follow-up**

Three thousand and thirty-seven patients (N=3,037) were included in the trial and randomized to either intervention or control group. One patient withdrew consent to use of his data and was excluded from analysis, leaving 3,036 patients in the analysis. In the systematic-strategy group, 17 patients were alive at hospital discharge and were lost to follow-up at 6 months. In the standard-strategy group, 27 patients were alive at hospital discharge and were lost to follow-up at 6 months. Primary outcome data from patients who were lost to follow-up before 6 months were censored at their last follow-up assessment. The primary outcome was analysed in the intention-to-treat population (N=3,036 patients).

## Electronic Database Search Strategy

The electronic search strategy was used to search for available randomized clinical trial of intensive care unit admission in critically ill elderly patients in the literature. This search strategy was peer-reviewed and approved by experts in literature review.

### Medline

- #1 Search "Critical Illness"[Mesh]
- #2 Search "Critical Care"[Mesh:noexp]
- #3 Search "Intensive Care Units"[Mesh]
- #4 Search "Critical Care Outcomes"[Mesh]
- #5 Search #1 OR #2 OR #3 OR #4
- #6 Search "Triage"[Mesh]
- #7 Search "Patient Admission"[Mesh]
- #8 Search #6 OR #7
- #9 Search "Aged"[Mesh]
- #10 Search Clinical Trial[ptyp]
- #11 Search #5 AND #8 AND #9 AND #10
- #12 Search "critically ill"[tw]
- #13 Search "critical illness"[tw] OR "critical illnesses"[tw]
- #14 Search "critical care"[tw]
- #15 Search "intensive care"[tw]
- #16 Search "critical care outcome"[tw] OR "critical care outcomes"[tw]
- #17 Search ICU[tw]
- #18 Search #12 OR #13 OR #14 OR #15 OR #16 OR #17
- #19 Search "old age"[tw] OR "old ages"[tw]
- #20 Search senior\*[tw]
- #21 Search aged[tw]
- #22 Search "advanced age"[tw] OR "advanced ages"[tw]
- #23 Search "old patient"[tw] OR "old patients"[tw]
- #24 Search elder\*[tw]
- #25 Search #19 OR #20 OR #21 OR #22 OR #23 OR #24
- #26 Search triage\*[tw]
- #27 Search admission\*[tw]
- #28 Search admitted[tw]
- #29 Search #26 OR #27 OR #28

#30 Search “randomized clinical trial”[tw] OR “randomized clinical trials”[tw] OR  
“randomised clinical trial”[tw] OR “randomised clinical trials”[tw]

#31 Search “randomized controlled trial”[tw] OR “randomized controlled trials”[tw]  
OR “randomised controlled trial”[tw] OR “randomised controlled trials”[tw]

#32 Search #30 OR # 31

#33 Search #18 and #25 and #29 and #32

#34 Search #11 OR #33

Date of last search: June 27<sup>th</sup> 2016

Number of references: 1175

## **Embase**

#1 Search “critical illness”/exp

#2 Search “intensive care”/exp

#3 Search “intensive care unit”/exp

#4 Search “critical care outcome”/exp

#5 Search #1 OR #2 OR #3 OR #4

#6 Search “hospital admission”/exp

#7 Search #5 AND #6

#8 Search #7 AND ‘randomized controlled trial’/de AND ([aged]/lim or [very  
elderly]/lim)

#9 Search “critically ill”

#10 Search “critical illness” or “critical illnesses”

#11 Search “critical care”

#12 Search “intensive care”

#13 Search “critical care outcome” or “critical care outcomes”

#14 Search ICU\*

#15 Search #9 OR #10 OR #11 OR #12 OR #13 OR #14

#16 Search “old age” OR “old ages”

#17 Search senior\*

#18 Search aged

#19 Search “advanced age” or “advanced ages”

#20 Search “old patient” or “old patients”

#21 Search elder\*

#22 Search #16 OR #17 OR #18 OR #19 OR #20 OR #21

#23 Search admission\*

#24 Search triage\*

#25 Search admitted

#26 Search #23 OR #24 OR #25

#27 Search “randomized clinical trial” OR “randomized clinical trials” OR  
“randomised clinical trial” OR “randomised clinical trials”

#28 Search “randomized controlled trial” OR “randomized controlled trials” OR  
“randomised controlled trial” OR “randomised controlled trials”

#29 Search #27 OR #28

#30 Search #15 AND #22 AND #26 AND #29

#31 Search #8 OR #30

#32 Search #31 AND [embase]/lim NOT [medline]/lim)

Date of last search: June 27<sup>th</sup> 2016

Number of references: 212



**eTable 1. List of the Critical Conditions for Inclusion\***

|                                             |                                                                                                                                                                                                                                                                                                                            |
|---------------------------------------------|----------------------------------------------------------------------------------------------------------------------------------------------------------------------------------------------------------------------------------------------------------------------------------------------------------------------------|
| Cardiac disorder                            | <ul style="list-style-type: none"> <li>Cardiogenic shock</li> <li>Congestive heart failure requiring NIV</li> <li>Arrhythmia</li> </ul>                                                                                                                                                                                    |
| Surgery                                     | <ul style="list-style-type: none"> <li>Neurosurgery</li> <li>Multiple traumatic injuries</li> <li>Cardiac</li> <li>Gastrointestinal</li> <li>Others</li> </ul>                                                                                                                                                             |
| Coma                                        | <ul style="list-style-type: none"> <li>Metabolic</li> <li>Toxic</li> <li>Stroke</li> <li>Status epilepticus</li> <li>Traumatism</li> <li>Anoxic</li> <li>Intracranial hypertension</li> </ul>                                                                                                                              |
| Respiratory disorder                        | <ul style="list-style-type: none"> <li>Chronic obstructive pulmonary disease</li> <li>Pulmonary embolism</li> <li>Severe pneumonia</li> <li>Acute respiratory failure requiring tracheal intubation</li> <li>Acute respiratory failure requiring NIV</li> <li>Acute respiratory failure requiring physiotherapy</li> </ul> |
| Gastrointestinal disorder                   | <ul style="list-style-type: none"> <li>Gastrointestinal tract hemorrhage</li> <li>Pancreatitis</li> <li>Acute liver insufficiency</li> <li>Abdominal emergency</li> </ul>                                                                                                                                                  |
| Shock                                       | <ul style="list-style-type: none"> <li>Septic</li> <li>Hemorrhagic</li> <li>Hypovolemic</li> <li>Others</li> </ul>                                                                                                                                                                                                         |
| Renal                                       | <ul style="list-style-type: none"> <li>Acute kidney failure</li> </ul>                                                                                                                                                                                                                                                     |
| Multiple traumatic injuries without surgery |                                                                                                                                                                                                                                                                                                                            |
| Others                                      |                                                                                                                                                                                                                                                                                                                            |

\* The list of critical conditions for inclusion was retrieved from the ICE-CUB 1 study<sup>1</sup>. This list of critical conditions adapted to the elderly patient was established by a Delphi consensus method among emergency department physicians and adapted from the *Guidelines for Intensive Care Unit Admission, Discharge, and Triage*<sup>2</sup> and restricted to critical conditions that potentially require an organ support. NIV: Non-Invasive Ventilation.

**eTable 2. Detailed list of Initial Clinical Diagnoses of Included Patients\***

|                                                            | <b>Systematic<br/>strategy<br/>(N=1,518)</b> | <b>Standard<br/>strategy<br/>(N=1,518)</b> |
|------------------------------------------------------------|----------------------------------------------|--------------------------------------------|
| <b>Cardiac disorder</b>                                    |                                              |                                            |
| Congestive heart failure requiring NIV                     | 87 (6)                                       | 131 (9)                                    |
| Arrhythmia                                                 | 45 (3)                                       | 54 (4)                                     |
| Cardiogenic shock                                          | 45 (3)                                       | 46 (3)                                     |
| <b>Surgery</b>                                             |                                              |                                            |
| Gastrointestinal                                           | 15 (1)                                       | 22 (1)                                     |
| Neurosurgery                                               | 3 (0.2)                                      | 6 (0.4)                                    |
| Cardiac                                                    | 3 (0.2)                                      | 2 (0.1)                                    |
| Multiple traumatic injuries                                | 1 (0.1)                                      | 2 (0.1)                                    |
| Others                                                     | 4 (0.3)                                      | 4 (0.3)                                    |
| <b>Coma</b>                                                |                                              |                                            |
| Stroke                                                     | 65 (4)                                       | 64 (4)                                     |
| Metabolic                                                  | 32 (2)                                       | 15 (1)                                     |
| Status epilepticus                                         | 27 (2)                                       | 13 (1)                                     |
| Toxic                                                      | 16 (1)                                       | 14 (1)                                     |
| Intracranial hypertension                                  | 11 (1)                                       | 18 (1)                                     |
| Anoxic                                                     | 24 (2)                                       | 1 (0.1)                                    |
| Trauma                                                     | 12 (1)                                       | 7 (0.5)                                    |
| <b>Respiratory disorder</b>                                |                                              |                                            |
| Chronic obstructive pulmonary disease                      | 71 (5)                                       | 109 (7)                                    |
| Pulmonary embolism                                         | 26 (2)                                       | 48 (3)                                     |
| Severe pneumonia requiring high oxygen supply              | 105 (7)                                      | 145 (10)                                   |
| Acute respiratory failure requiring mechanical ventilation | 57 (4)                                       | 32 (2)                                     |
| Acute respiratory failure requiring NIV                    | 209 (14)                                     | 138 (9)                                    |
| Acute respiratory failure requiring physiotherapy          | 20 (1)                                       | 19 (1)                                     |

**eTable 2. Detailed list of Initial Clinical Diagnoses of Included Patients\***  
**(continued)**

|                                             | <b>Systematic<br/>strategy<br/>(N=1,518)</b> | <b>Standard<br/>strategy<br/>(N=1,518)</b> |
|---------------------------------------------|----------------------------------------------|--------------------------------------------|
| Gastrointestinal tract hemorrhage           | 40 (3)                                       | 57 (4)                                     |
| Pancreatitis                                | 3 (0.2)                                      | 14 (1)                                     |
| Acute liver insufficiency                   | 0 (0)                                        | 5 (0.3)                                    |
| Abdominal emergency                         | 14 (1)                                       | 41 (3)                                     |
| <b>Renal</b>                                |                                              |                                            |
| Acute kidney failure                        | 86 (6)                                       | 61 (4)                                     |
| <b>Shock</b>                                |                                              |                                            |
| Septic                                      | 244 (16)                                     | 169 (11)                                   |
| Hemorrhagic                                 | 35 (2)                                       | 21 (1)                                     |
| Hypovolemic                                 | 30 (2)                                       | 32 (2)                                     |
| Others                                      | 11 (1)                                       | 16 (1)                                     |
| Multiple traumatic injuries without surgery | 10 (1)                                       | 9 (1)                                      |
| Others                                      | 165 (11)                                     | 202 (13)                                   |

\* Data are provided as numbers and percentages. NIV: Non-Invasive Ventilation.

**eTable 3. Characteristics of the Triage Process\***

|                                                            | <b>Systematic<br/>strategy<br/>(N=1,518)</b> | <b>Standard<br/>strategy<br/>(N=1,518)</b> | <b>P<br/>Value</b> |
|------------------------------------------------------------|----------------------------------------------|--------------------------------------------|--------------------|
| <b>Time of hospital admission - no. (%)</b>                |                                              |                                            |                    |
| 8am-11pm                                                   | 1,297 (85)                                   | 1,320 (87)                                 | 0.22               |
| Midnight-7am                                               | 221 (15)                                     | 198 (13)                                   |                    |
| <b>Seniority of ED physicians - no./no. total (%)</b>      |                                              |                                            |                    |
| ≥ 2 years                                                  | 871/1,505 (58)                               | 1,095/1,482 (74)                           | <0.001             |
| < 2 years                                                  | 343/1,505 (23)                               | 102/1,482 (7)                              |                    |
| Resident                                                   | 291/1,505 (19)                               | 285/1,482 (19)                             |                    |
| <b>Seniority of ICU physicians - no./no. total (%)</b>     |                                              |                                            |                    |
| ≥ 2 years                                                  | 1106/1,345 (82)                              | 514/660 (78)                               | 0.003              |
| < 2 years                                                  | 170/1,345 (13)                               | 86/660 (13)                                |                    |
| Resident                                                   | 69/1,346 (5)                                 | 60/660 (9)                                 |                    |
| <b>Primary referent** - no./no. total (%)</b>              |                                              |                                            |                    |
| Child                                                      | 656/1,445 (45)                               | 690/1,392 (50)                             | <0.001             |
| Spouse / living partner                                    | 401/1,445 (28)                               | 281/1,392 (20)                             |                    |
| Other family member                                        | 195/1,445 (13)                               | 216/1,392 (15)                             |                    |
| General practitioner / nurse                               | 55/1,445 (4)                                 | 62/1,392 (4)                               |                    |
| Friend                                                     | 44/1,445 (3)                                 | 35/1,392 (3)                               |                    |
| Neighbor                                                   | 17/1,445 (1)                                 | 22/1,392 (2)                               |                    |
| None                                                       | 77/1,445 (5)                                 | 86/1,392 (6)                               |                    |
| <b>Identified general practitioner - no./no. total (%)</b> |                                              |                                            |                    |
| Yes                                                        | 1,046/1,518 (69)                             | 1,053/1,483 (71)                           | 0.22               |
| No                                                         | 472/1,518 (31)                               | 430/1,483 (29)                             |                    |
| <b>Perceived burden for family - no./no. total (%)</b>     |                                              |                                            |                    |
| Average                                                    | 477/644 (74)                                 | 148/180 (82)                               | 0.07               |
| Heavy but bearable                                         | 156/644 (24)                                 | 30/180 (17)                                |                    |
| Unbearable                                                 | 11/644 (2)                                   | 2/180 (0.1)                                |                    |

**eTable 3. Characteristics of the Triage Process (Continued)\***

|                                                                                  | <b>Systematic strategy (N=1,518)</b> | <b>Standard strategy (N=1,518)</b> | <b>P Value</b> |
|----------------------------------------------------------------------------------|--------------------------------------|------------------------------------|----------------|
| <b>ED physicians: opinion about ICU admission - no./no. total (%)</b>            |                                      |                                    |                |
| Favorable                                                                        | 1,327/1,513 (88)                     | 875/1,425 (61)                     | <0.001         |
| Unfavorable                                                                      | 186/1,513 (12)                       | 550/1,425 (39)                     |                |
| <b>ED physicians: reason for not proposing ICU admission- no./no. total (%)</b>  |                                      |                                    |                |
| Patient is too well                                                              | 66/179 (37)                          | 209/390 (54)                       | 0.001          |
| No expected benefit due to underlying disease                                    | 69/179 (39)                          | 113/390 (29)                       |                |
| Patient is too sick                                                              | 44/179 (25)                          | 68/390 (17)                        |                |
| <b>ICU physicians: opinion about ICU admission - no./no. total (%)</b>           |                                      |                                    |                |
| Favorable                                                                        | 1,110/1,473 (75)                     | 623/938 (66)                       | <0.001         |
| Unfavorable                                                                      | 363/1,473 (25)                       | 315/938 (34)                       |                |
| <b>ICU physicians: reason for not proposing ICU admission- no./no. total (%)</b> |                                      |                                    |                |
| Patient is too well                                                              | 148/355 (42)                         | 105/292 (36)                       | 0.25           |
| No expected benefit due to underlying disease                                    | 115/355 (32)                         | 116/292 (40)                       |                |
| Patient is too sick                                                              | 49/355 (14)                          | 40/292 (14)                        |                |
| Few available beds                                                               | 43/355 (12)                          | 31/292 (11)                        |                |
| <b>Opinion about ICU admission - no./no. total (%)</b>                           |                                      |                                    |                |
| <b>Patients favorable</b>                                                        |                                      |                                    |                |
| and relatives favorable                                                          | 207/1,515 (14)                       | 53/1,517 (3)                       | <0.001         |
| and relatives unfavorable                                                        | 1/1,515 (0.1)                        | 0/1,517 (0)                        |                |
| and relatives have no opinion                                                    | 206/1,515 (14)                       | 92/1,517 (6)                       |                |
| <b>Patients unfavorable</b>                                                      |                                      |                                    |                |
| and relatives favorable                                                          | 0/1,515 (0)                          | 2/1,517 (0.1)                      |                |
| and relatives unfavorable                                                        | 11/1,515 (1)                         | 14/1,517 (1)                       |                |
| and relatives have no opinion                                                    | 10/1,515 (1)                         | 16/1,517 (1)                       |                |
| <b>Patients have no or unknown opinion</b>                                       |                                      |                                    |                |
| and relatives favorable                                                          | 214/1,515 (14)                       | 77/1,517 (5)                       |                |
| and relatives unfavorable                                                        | 57/1,515 (4)                         | 57/1,517 (4)                       |                |
| and relatives have no opinion                                                    | 809/1,515 (53)                       | 1206/1,517 (79)                    |                |

\* Data are reported as numbers and percentages. ED: Emergency Department, ICU: Intensive Care Unit

\*\* Primary referent is the person who could take responsibility in the decision-making process

**eTable 4. Number and Characteristics of Protocol Violations\***

| <b>Protocol violations</b>                      | <b>Systematic strategy<br/>(N=1,518)</b> | <b>Standard strategy<br/>(N=1,518)</b> |
|-------------------------------------------------|------------------------------------------|----------------------------------------|
| Index of ADL** < 4                              | 5                                        | 16                                     |
| Age < 75 years                                  | 1                                        | 5                                      |
| Presence of cachexia                            | 5                                        | 2                                      |
| Absence of a pre-established critical condition | 4                                        | 4                                      |
| No social security coverage                     | 1                                        | 3                                      |
| Patient with known active cancer                | 1                                        | 4                                      |
|                                                 | 16***                                    | 33***                                  |

\*There were a total of 49 protocol violation (49/3,036, 1.6%).

\*\* Index of Independence in Activities of Daily Living<sup>1</sup>.

\*\*\*Two patients did not meet two inclusion criteria.

**eTable 5. Number of Decisions for ICU Admission and Number of Patients Actually Admitted\***

| Decisions for ICU admission | Patients Admitted to the ICU |     |       |
|-----------------------------|------------------------------|-----|-------|
|                             | No                           | Yes | Total |
| <b>Systematic-strategy</b>  |                              |     |       |
| No                          | 572                          | 1   | 573   |
| Yes                         | 0                            | 931 | 931   |
| Total                       | 572                          | 932 |       |
| <b>Standard-strategy</b>    |                              |     |       |
| No                          | 986                          | 0   | 986   |
| Yes                         | 0                            | 516 | 516   |
| Total                       | 986                          | 516 |       |

\* The number of decisions for ICU admission is not significantly different than the number of patients actually admitted to the ICU. In the systematic-strategy group, one patient was admitted to the ICU while a decision for no ICU admission had been made.

**eTable 6. Characteristics of Patients Admitted to the Intensive Care Unit**

|                                                  | <b>Systematic strategy (N=932)</b> | <b>Standard strategy (N=516)</b> | <b>Difference in medians or proportions (95%CI)</b> | <b>P Value</b> |
|--------------------------------------------------|------------------------------------|----------------------------------|-----------------------------------------------------|----------------|
| Age (years) - median (IQR)                       | 84 (80-88)                         | 84 (80-88)                       | 0 (-0.5-1)                                          | 0.28           |
| SAPS 3* - median (IQR)                           | 65 (57-72)                         | 62 (56-68)                       | 3 (2-5)                                             | <0.001         |
| ICU length of stay (days)** - median (IQR)       | 4 (2-7)                            | 3 (1-6.3)                        | -1 (-0.5-1)                                         | 0.32           |
| Hospital length of stay (days)*** - median (IQR) | 12 (4-22)                          | 11 (5-19.8)                      | -1 (-1-3)                                           | 0.98           |
| Male sex - no. (%)                               | 448 (48)                           | 236 (46)                         | 2 (-3 - 8)                                          | 0.43           |
| Mechanical ventilation - no. (%)                 | 374/884 (42)                       | 147/470 (31)                     | 11 (6 - 16)                                         | <0.001         |
| Non-invasive ventilation - no. (%)               | 251/884 (28)                       | 170/470 (36)                     | -8 (-13 - -3)                                       | 0.004          |
| Vasopressors - no. (%)                           | 346/884 (39)                       | 166/469 (35)                     | 4 (-2 - 9)                                          | 0.20           |
| Kidney replacement therapy - no. (%)             | 117/884 (13)                       | 49/469 (10)                      | 3 (-1 - 6)                                          | 0.16           |
| Fluid resuscitation - no. (%)                    | 177/835 (21)                       | 151/469 (32)                     | -11 (-16 - -6)                                      | <0.001         |
| Number of interventions - no. (%)                |                                    |                                  |                                                     |                |
| At least one****                                 | 711/873 (81)                       | 402/470 (86)                     |                                                     | 0.07           |
| None*****                                        | 162/873 (19)                       | 68/470 (14)                      |                                                     |                |

\* The Simplified Acute Physiology Score (SAPS) <sup>34</sup> ranges from 0 to 146, with higher scores indicating a more severe disease and a higher risk of death; data available for 897 patients in the systematic-strategy group and 482 patients in the standard-strategy group.

\*\* Data available for 906 patients in the systematic-strategy group and 511 patients in the standard-strategy group.

\*\*\* Data available for 913 patients in the systematic-strategy group and 512 patients in the standard strategy group.

\*\*\*\* Number of patients who received at least one of the following interventions: invasive or non-invasive ventilation, vasopressors, renal replacement therapy or fluid resuscitation.

ICU: Intensive Care Unit, IQR: Interquartile Range



**eTable 7. Baseline Index of Independence in Activities of Daily Living\***

| <b>Index of ADL</b> | <b>Systematic strategy (N=1,330)</b> | <b>Standard strategy (N=1,200)</b> |
|---------------------|--------------------------------------|------------------------------------|
| < 4.0               | 5 (0.4)                              | 16 (1)                             |
| 4.0                 | 109 (8)                              | 106 (9)                            |
| 4.5                 | 106 (8)                              | 63 (5)                             |
| 5.0                 | 134 (10)                             | 103 (9)                            |
| 5.5                 | 140 (11)                             | 121 (10)                           |
| 6.0                 | 836 (63)                             | 791 (66)                           |

\* The Index of Independence in Activities of Daily Living (Index of ADL)<sup>1</sup> is based on an evaluation of the functional independence or dependence of patients in bathing, dressing, going the toilet, transferring, continence and feeding and ranges from 0, totally dependent to 6, independent; 188 missing values in the systematic-strategy group and 318 missing values in the standard-strategy group

**eTable 8. Index of Activities in Daily Living Scale at 6 months\***

| Index of ADL** | Systematic strategy (N=750) | Standard strategy (N=778) | P Value |
|----------------|-----------------------------|---------------------------|---------|
| 0.0            | 18 (2)                      | 21 (3)                    | 0.09    |
| 0.5            | 25 (3)                      | 17 (2)                    |         |
| 1.0            | 25 (3)                      | 34 (4)                    |         |
| 1.5            | 15 (2)                      | 5 (1)                     |         |
| 2.0            | 24 (3)                      | 27 (3)                    |         |
| 2.5            | 27 (4)                      | 20 (3)                    |         |
| 3.0            | 31 (4)                      | 28 (4)                    |         |
| 3.5            | 45 (6)                      | 36 (5)                    |         |
| 4.0            | 47 (6)                      | 40 (5)                    |         |
| 4.5            | 55 (7)                      | 52 (7)                    |         |
| 5.0            | 77 (10)                     | 98 (13)                   |         |
| 5.5            | 139 (19)                    | 126 (16)                  |         |
| 6.0            | 222 (30)                    | 274 (35)                  |         |

\* The Index of Independence in Activities of Daily Living<sup>1</sup> (Index of ADL) is based on an evaluation of the functional independence or dependence of patients in bathing, dressing, going the toilet, transferring, continence and feeding and ranges from 0, totally dependent to 6, independent.

\*\* Data on Index of ADL at 6 months were available for 750 patients in the systematic-strategy group and for 777 patients in the standard-strategy group.

**eTable 9. Additional data at 6-month follow-up.**

|                                             | <b>Systematic<br/>strategy<br/>(N=1,067)</b> | <b>Standard<br/>strategy<br/>(N=1,192)</b> | <b>P Value</b> |
|---------------------------------------------|----------------------------------------------|--------------------------------------------|----------------|
| Median duration of follow-up - months (IQR) | 6.0 (6.0-6.1)                                | 6.0 (6.0-6.1)                              |                |
| Deaths during follow-up*                    | 234                                          | 262                                        |                |
| Contact for follow-up - no./total no. (%)   |                                              |                                            |                |
| Primary referent** / relatives              | 524/1,065 (49)                               | 651/1,191 (55)                             | 0.02           |
| Patient                                     | 456/1,065 (43)                               | 445/1,191 (37)                             |                |
| General Practitioner                        | 69/1,065 (6)                                 | 68/1,191 (6)                               |                |
| Lost to follow-up                           | 16/1,065 (2)                                 | 27/1,191 (2)                               |                |
| Living place - no./total no. (%)            |                                              |                                            |                |
| Home                                        | 346/800 (43)                                 | 394/854 (46)                               | 0.60           |
| Home with assistance                        | 270/800 (34)                                 | 272/854 (32)                               |                |
| Long-term care                              | 108/800 (14)                                 | 106/854 (12)                               |                |
| Hospital                                    | 46/800 (6)                                   | 57/854 (7)                                 |                |
| Nursing home                                | 29/800 (4)                                   | 25/854 (3)                                 |                |
| Homeless                                    | 1/800 (0.1)                                  | 0/854 (0)                                  |                |
| Home support - no./total no. (%)            |                                              |                                            |                |
| Alone                                       | 361/747 (48)                                 | 390/780 (50)                               | 0.002          |
| Spouse/partner                              | 292/747 (39)                                 | 250/780 (32)                               |                |
| Family                                      | 94/747 (13)                                  | 140/780 (18)                               |                |

\*After hospital discharge

IQR : Interquartile Range

\*\* Person who could take responsibility in the decision-making process

## eReferences

1. Katz S, Ford AB, Moskowitz RW, Jackson BA, Jaffe MW. Studies of Illness in the Aged. The Index of Adl: A Standardized Measure of Biological and Psychosocial Function. *Jama* 1963;185:914-9.
2. Garrouste-Orgeas M, Boumendil A, Pateron D, et al. Selection of intensive care unit admission criteria for patients aged 80 years and over and compliance of emergency and intensive care unit physicians with the selected criteria: An observational, multicenter, prospective study. *Critical care medicine* 2009;37:2919-28.
3. Guidelines for intensive care unit admission, discharge, and triage. Task Force of the American College of Critical Care Medicine, Society of Critical Care Medicine. *Critical care medicine* 1999;27:633-8.
4. Moreno RP, Metnitz PG, Almeida E, et al. SAPS 3--From evaluation of the patient to evaluation of the intensive care unit. Part 2: Development of a prognostic model for hospital mortality at ICU admission. *Intensive care medicine* 2005;31:1345-55.
